# Supplementary material for: Influence of sex and phenotype on cardiac outcomes in patients with Fabry disease
Source: HighWire-hosted journal article supplement (doi:10.1136/heartjnl-2020-317922), 2021-02-10

| <b>Supplemental table 3: Classification of myocardial infarctions</b>                                                               |           |                |                    |                |                    |
|-------------------------------------------------------------------------------------------------------------------------------------|-----------|----------------|--------------------|----------------|--------------------|
|                                                                                                                                     | All (213) | Men (83)       |                    | Women (130)    |                    |
|                                                                                                                                     |           | Classical (57) | Non-classical (26) | Classical (98) | Non-classical (32) |
| <b>Type I, n</b>                                                                                                                    | 7         | 3              | 1                  | 3              | 0                  |
| STEMI, n                                                                                                                            | 3         | 1              | 1                  | 1              | -                  |
| NSTEMI, n                                                                                                                           | 3         | 1              | 0                  | 2              | -                  |
| Unknown, n                                                                                                                          | 1         | 1              | 0                  | 0              | -                  |
| <b>Type II, n</b>                                                                                                                   | 5         | 2              | 0                  | 3              | 0                  |
| NSTEMI, n                                                                                                                           | 5         | 2              | -                  | 3              | -                  |
| <b>Unknown type of infarction, n</b>                                                                                                | 10        | 3              | 3                  | 4              | 0                  |
| NSTEMI, n                                                                                                                           | 4         | 1              | 1                  | 2              | -                  |
| Unknown, n                                                                                                                          | 6         | 2              | 2                  | 2              | -                  |
| n = number of patients; STEMI = ST-segment elevation myocardial infarction; NSTEMI = Non-ST-segment elevation myocardial infarction |           |                |                    |                |                    |

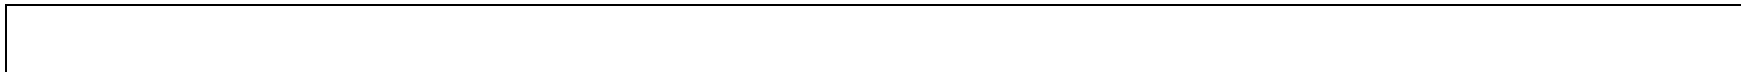

Supplement: heartjnl-2020-317922supp009_data_supplement.pdf [file heartjnl-2020-317922supp009_data_supplement.pdf]
