# Supplementary material for: Influence of sex and phenotype on cardiac outcomes in patients with Fabry disease
Source: HighWire-hosted journal article supplement (doi:10.1136/heartjnl-2020-317922), 2021-02-10
Supplement: heartjnl-2020-317922supp002_data_supplement.pdf [file heartjnl-2020-317922supp002_data_supplement.pdf]

| <b>Supplemental table 2 Prevalence, event rates and age at onset of individual outcomes †</b> |               |                |                    |                |                    |
|-----------------------------------------------------------------------------------------------|---------------|----------------|--------------------|----------------|--------------------|
|                                                                                               | All (213)     | Men (83)       |                    | Women (130)    |                    |
|                                                                                               |               | Classical (57) | Non-classical (26) | Classical (98) | Non-classical (32) |
| <b>1. Sudden cardiac death</b>                                                                |               |                |                    |                |                    |
| Number of patients                                                                            | 4 (2%)        | 4 (7%)         | 0 (0%)             | 0 (0%)         | 0 (0%)             |
| Event rate, with 95%-CI                                                                       | 0.6 (0.2-1.4) | 2.6 (0.8-6.2)  | 0 (-)              | 0 (-)          | 0 (-)              |
| Age at death                                                                                  | 48 (47-56)    | 48 (47-56)     | (-)                | (-)            | (-)                |
| <b>2. Sudden cardiac arrest</b>                                                               |               |                |                    |                |                    |
| Number of patients                                                                            | 6 (3%)        | 1 (2%)         | 3 (12%)            | 2 (2%)         | 0 (0%)             |
| Event rate, with 95%-CI                                                                       | 0.8 (0.3-1.8) | 0.6 (0.03-3.2) | 2.5 (0.6-6.9)      | 0.6 (0.1-2.1)  | 0 (-)              |
| Age at first event                                                                            | 66 (46-73)    | 46 (-)         | 67 (64-67)         | 65 (57-73)     | (-)                |
| <b>3. Sustained ventricular tachycardia</b>                                                   |               |                |                    |                |                    |
| Number of patients                                                                            | 4 (2%)        | 0 (0%)         | 2 (8%)             | 2 (2%)         | 0 (0%)             |

|                                              |                |                |                |                |        |
|----------------------------------------------|----------------|----------------|----------------|----------------|--------|
| Event rate, with 95%-CI                      | 0.6 (0.2-1.4)  | 0 (-)          | 1.7 (0.3-5.6)  | 0.6 (0.1-2.1)  | 0 (-)  |
| Age at first event                           | 66 (51-73)     | (-)            | 66 (64-67)     | 62 (51-73)     | (-)    |
| <b>4. Ventricular fibrillation</b>           |                |                |                |                |        |
| Number of patients                           | 2 (1%)         | 1 (2%)         | 0 (0%)         | 1 (1%)         | 0 (0%) |
| Event rate, with 95%-CI                      | 0.3 (0.1-0.9)  | 0.6 (0.03-3.2) | 0 (-)          | 0.3 (0.02-1.5) | 0 (-)  |
| Age at first event                           | 59 (46-73)     | 46 (-)         | (-)            | 73 (-)         | (-)    |
| <b>5. Second- degree AV block, Mobitz II</b> |                |                |                |                |        |
| Number of patients                           | 1(1%)          | 0 (0%)         | 1 (4%)         | 0 (0%)         | 0 (0%) |
| Event rate, with 95%-CI                      | 0.1 (0.01-0.7) | 0 (-)          | 0.8 (0.04-4.1) | 0 (-)          | 0 (-)  |
| Age at first documentation                   | 65 (-)         | (-)            | 65 (-)         | (-)            | (-)    |
| <b>6. Third- degree AV block</b>             |                |                |                |                |        |
| Number of patients                           | 9 (4%)         | 1 (2%)         | 4 (15%)        | 4 (4%)         | 0 (0%) |
| Event rate, with 95%-CI                      | 1.3 (0.6-2.3)  | 0.6 (0.03-3.2) | 3.4 (1.1-8.1)  | 1.2 (0.4-3.0)  | 0 (-)  |

|                                          |               |               |               |               |        |
|------------------------------------------|---------------|---------------|---------------|---------------|--------|
| Age at first documentation               | 60 (50-72)    | 60 (-)        | 58 (50-63)    | 59 (54-72)    | (-)    |
| <b>7. Sinusarrest</b>                    |               |               |               |               |        |
| Number of patients                       | 7 (3%)        | 3 (5%)        | 2 (8%)        | 2 (2%)        | 0 (0%) |
| Event rate, with 95%-CI                  | 1.0 (0.4-2.0) | 1.9 (0.5-5.3) | 1.7 (0.3-5.6) | 0.6 (0.1-2.1) | 0 (-)  |
| Age at first documentation               | 58 (48-69)    | 58 (48-60)    | 60 (58-62)    | 59 (49-69)    | (-)    |
| <b>8. PM, ICD and CRT-D implantation</b> |               |               |               |               |        |
| Number of patients                       | 36 (17%)      | 9 (16%)       | 11 (42%)      | 14 (14%)      | 2 (6%) |
| PM                                       | 14 (7%)       | 4 (7%)        | 3 (12%)       | 5 (5%)        | 2 (6%) |
| PM + ICD upgrade at later stage          | 3 (1%)        | 0 (0%)        | 2 (8%)        | 1 (1%)        | 0 (0%) |
| ICD                                      | 7 (3%)        | 0 (0%)        | 3 (12%)       | 4 (4%)        | 0 (0%) |
| DDD-ICD                                  | 9 (4%)        | 3 (5%)        | 2 (8%)        | 4 (4%)        | 0 (0%) |
| CRT-D                                    | 2 (1%)        | 2 (4%)        | 0 (0%)        | 0 (0%)        | 0 (0%) |

|                                                 |               |                |                |               |        |
|-------------------------------------------------|---------------|----------------|----------------|---------------|--------|
| PM + CRT-D upgrade at later stage               | 1 (0.5%)      | 0 (0%)         | 1 (4%)         | 0 (0%)        | 0 (0%) |
| <b>9. Coronary artery disease</b>               |               |                |                |               |        |
| Number of patients                              | 18 (9%)       | 9 (16%)        | 3 (12%)        | 6 (6%)        | 0 (0%) |
| Event rate, with 95%-CI                         | 2.5 (1.6-3.9) | 5.8 (2.8-10.7) | 2.5 (0.6-6.9)  | 1.9 (0.8-3.9) | 0 (-)  |
| Age at first documentation                      | 55 (39-77)    | 51 (46-64)     | 55 (53-67)     | 57 (39-77)    | (-)    |
| <b>10. Percutaneous coronary intervention</b>   |               |                |                |               |        |
| Number of patients                              | 7 (3%)        | 3 (5%)         | 2 (8%)         | 2 (2%)        | 0 (0%) |
| Event rate, with 95%-CI                         | 1.0 (0.4-2.0) | 1.9 (0.5-5.3)  | 1.7 (0.3-5.6)  | 0.6 (0.1-2.1) | 0 (-)  |
| Age at first documentation                      | 53 (39-67)    | 50 (48-64)     | 61 (55-67)     | 46 (39-53)    | (-)    |
| <b>11. Coronary artery bypass graft surgery</b> |               |                |                |               |        |
| Number of patients                              | 4 (2%)        | 3 (5%)         | 1 (4%)         | 0 (0%)        | 0 (0%) |
| Event rate, with 95%-CI                         | 0.6 (0.2-1.4) | 1.9 (0.5-5.3)  | 0.8 (0.04-4.1) | 0 (-)         | 0 (-)  |
| Age at first surgery                            | 58 (54-69)    | 58 (54-58)     | 69             | (-)           | (-)    |

|                                                            |               |                |                |               |                |
|------------------------------------------------------------|---------------|----------------|----------------|---------------|----------------|
| <b>12. Systolic dysfunction on MRI or echocardiography</b> |               |                |                |               |                |
| Number of patients                                         | 28 (13%)      | 11 (19%)       | 8 (31%)        | 8 (8%)        | 1 (3%)         |
| Event rate, with 95%-CI                                    | 3.9 (2.7-5.6) | 7.1 (3.7-12.4) | 6.7 (3.1-12.8) | 2.5 (1.2-4.7) | 0.9 (0.04-4.3) |
| Age at first documentation                                 | 60 (29-77)    | 52 (29-64)     | 64 (53-69)     | 65 (54-77)    | 72 (-)         |
| <b>13. Left ventricular outflow tract obstruction</b>      |               |                |                |               |                |
| Number of patients                                         | 8 (4%)        | 2 (4%)         | 1 (4%)         | 4 (4%)        | 1 (3%)         |
| Event rate, with 95%-CI                                    | 1.1 (0.5-2.1) | 1.3 (0.2-4.3)  | 0.8 (0.04-4.1) | 1.2 (0.4-3.0) | 0.9 (0.04-4.3) |
| Age at first documentation                                 | 56 (31-65)    | 43 (31-55)     | 58 (-)         | 57 (46-61)    | 65 (-)         |
| <b>14. Moderate or severe heart valve disease</b>          |               |                |                |               |                |
| Number of patients                                         | 39 (18%)      | 14 (25%)       | 6 (23%)        | 16 (16%)      | 3 (9%)         |
| Event rate, with 95%-CI                                    | 5.5 (4.0-7.4) | 9.1 (5.2-14.8) | 5.0 (2.0-10.5) | 5.0 (3.0-7.9) | 2.6 (0.7-7.2)  |
| Age at first documentation                                 | 58 (36-77)    | 51 (36-61)     | 65 (51-70)     | 61 (47-77)    | 74 (65-76)     |

| 15. Heart surgery/ intervention*   |               |               |               |               |        |
|------------------------------------|---------------|---------------|---------------|---------------|--------|
| Number of patients                 | 10 (5%)       | 2 (4%)        | 3 (12%)       | 5 (5 %)       | 0 (0%) |
| Event rate, with 95%-CI            | 1.4 (0.7-2.5) | 1.3 (0.2-4.3) | 2.5 (0.6-6.9) | 1.6 (0.6-3.5) | 0 (-)  |
| Age at first surgery/ intervention | 63 (49-72)    | 53 (49-57)    | 64 (64-68)    | 61 (52-72)    | (-)    |

Data are presented as number (percentage) or median (range). All event rates are per 1000 patient years from age 15 onwards.

† Events per 1000 person years from age of 15 = (Number of events/ Cumulative follow up from age 15)x1000

\* heart surgery or intervention other than percutaneous coronary intervention or coronary artery bypass graft surgery

AV = atrioventricular; CRT = cardiac resynchronization therapy; ICD = implantable cardiac defibrillator; PM = pacemaker
