# Supplementary material for: Influence of sex and phenotype on cardiac outcomes in patients with Fabry disease
Source: HighWire-hosted journal article supplement (doi:10.1136/heartjnl-2020-317922), 2021-02-10
Supplement: heartjnl-2020-317922supp010_data_supplement.pdf [file heartjnl-2020-317922supp010_data_supplement.pdf]

| <b>Supplemental table 4: Patient kidney characteristics</b> |           |                |                    |                |                    |
|-------------------------------------------------------------|-----------|----------------|--------------------|----------------|--------------------|
|                                                             | All (213) | Men (83)       |                    | Women (130)    |                    |
|                                                             |           | Classical (57) | Non-classical (26) | Classical (98) | Non-classical (32) |
| KDIGO CKD stages**                                          |           |                |                    |                |                    |
| Patients with a known CKD stage, n (%)                      | 152 (71%) | 41 (72%)       | 13 (50%)           | 82 (84%)       | 16 (50%)           |
| G1 (eGFR >90), n (%)                                        | 75 (49%)  | 23 (56%)       | 3 (23%)            | 37 (45%)       | 12 (75%)           |
| G2 (eGFR 60-89), n (%)                                      | 48 (32%)  | 9 (22%)        | 4 (31%)            | 33 (40%)       | 2 (13%)            |
| G3a (eGFR 45-59), n (%)                                     | 13 (9%)   | 1 (2%)         | 2 (15%)            | 8 (10%)        | 2 (13%)            |
| G3b (eGFR 30-44), n (%)                                     | 12 (8%)   | 7 (17%)        | 2 (15%)            | 3 (4%)         | 0 (0%)             |
| G4 (eGFR 15-29), n (%)                                      | 3 (2%)    | 1 (2%)         | 1 (8%)             | 1 (1%)         | 0 (0%)             |
| G5 (eGFR <15), n (%)                                        | 1 (1%)    | 0 (0%)         | 1 (8%)             | 0 (0%)         | 0 (0%)             |
| Proteinuria (microalbuminuria > 300 milligrams/ 24 hours)** |           |                |                    |                |                    |

|                                                                                                                                                                                                                                                                                                                                                                                                                                                                                                  |          |          |         |          |          |
|--------------------------------------------------------------------------------------------------------------------------------------------------------------------------------------------------------------------------------------------------------------------------------------------------------------------------------------------------------------------------------------------------------------------------------------------------------------------------------------------------|----------|----------|---------|----------|----------|
| Patients with a known proteinuria status, n (%)                                                                                                                                                                                                                                                                                                                                                                                                                                                  | 71 (33%) | 16 (28%) | 7 (27%) | 41 (42%) | 7 (22%)  |
| Present proteinuria, n (%)                                                                                                                                                                                                                                                                                                                                                                                                                                                                       | 12 (17%) | 4 (25%)  | 3 (43%) | 5 (12%)  | 0 (0%)   |
| Absent proteinuria, n (%)                                                                                                                                                                                                                                                                                                                                                                                                                                                                        | 59 (83%) | 12 (75%) | 4 (57%) | 36 (88%) | 7 (100%) |
| <p>KDIGO= Kidney Disease Improving Global Outcomes; CKD= Chronic Kidney Disease; eGFR= estimated Glomerular Filtration Rate, according to the Chronic Kidney Disease Epidemiology Collaboration equation and measured in milliliters/ minute per 1.73 meter<sup>2</sup></p> <p>** The KDIGO CKD and proteinuria status are measurements, which are known at the time of the last follow-up (with a minimum and maximum range of 1 year between the measurement and the last follow-up date).</p> |          |          |         |          |          |
