# Supplementary figures and images for: Influence of sex and phenotype on cardiac outcomes in patients with Fabry disease
Source: HighWire-hosted journal article supplement (doi:10.1136/heartjnl-2020-317922), 2021-02-10

Supplemental figure 1

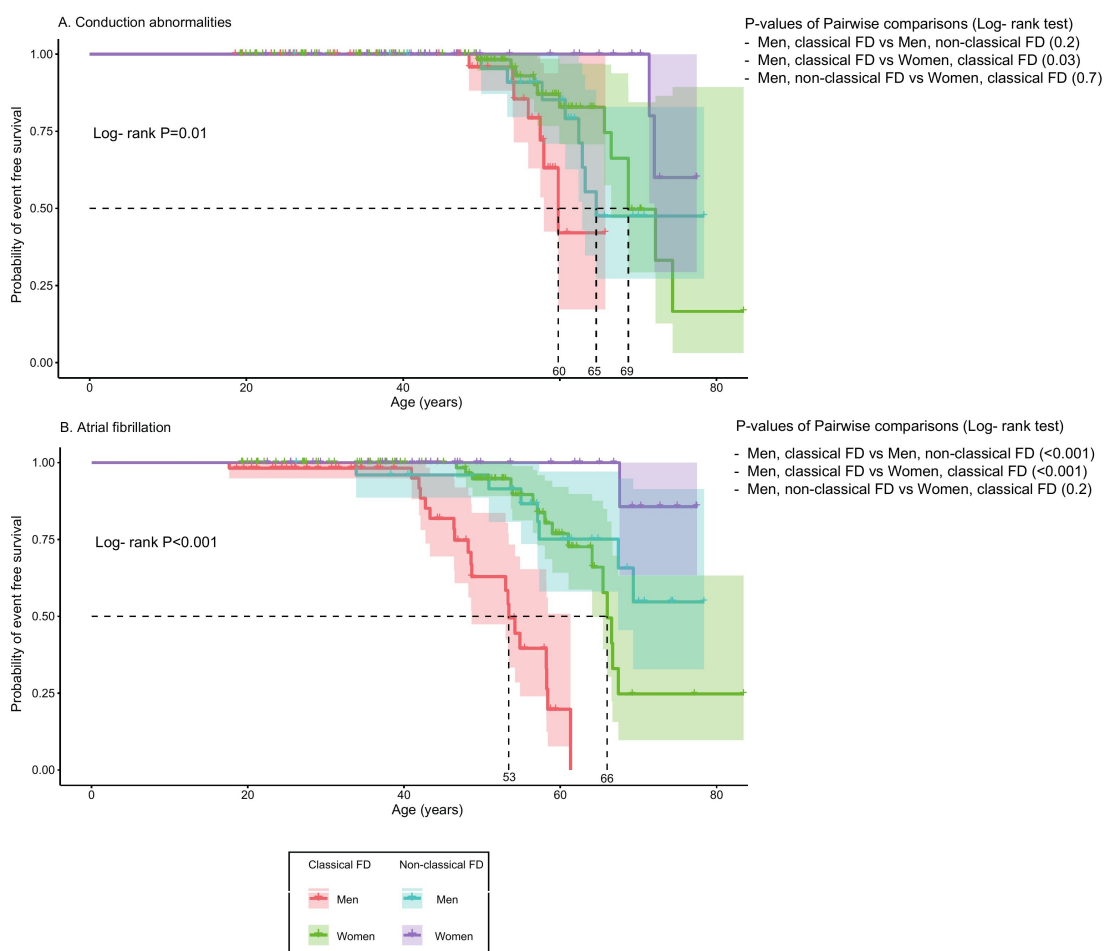

Supplement: heartjnl-2020-317922supp003_data_supplement.pdf [file heartjnl-2020-317922supp003_data_supplement.pdf]

Supplemental figure 2: Major adverse cardiovascular events, competing risk= non-CVD

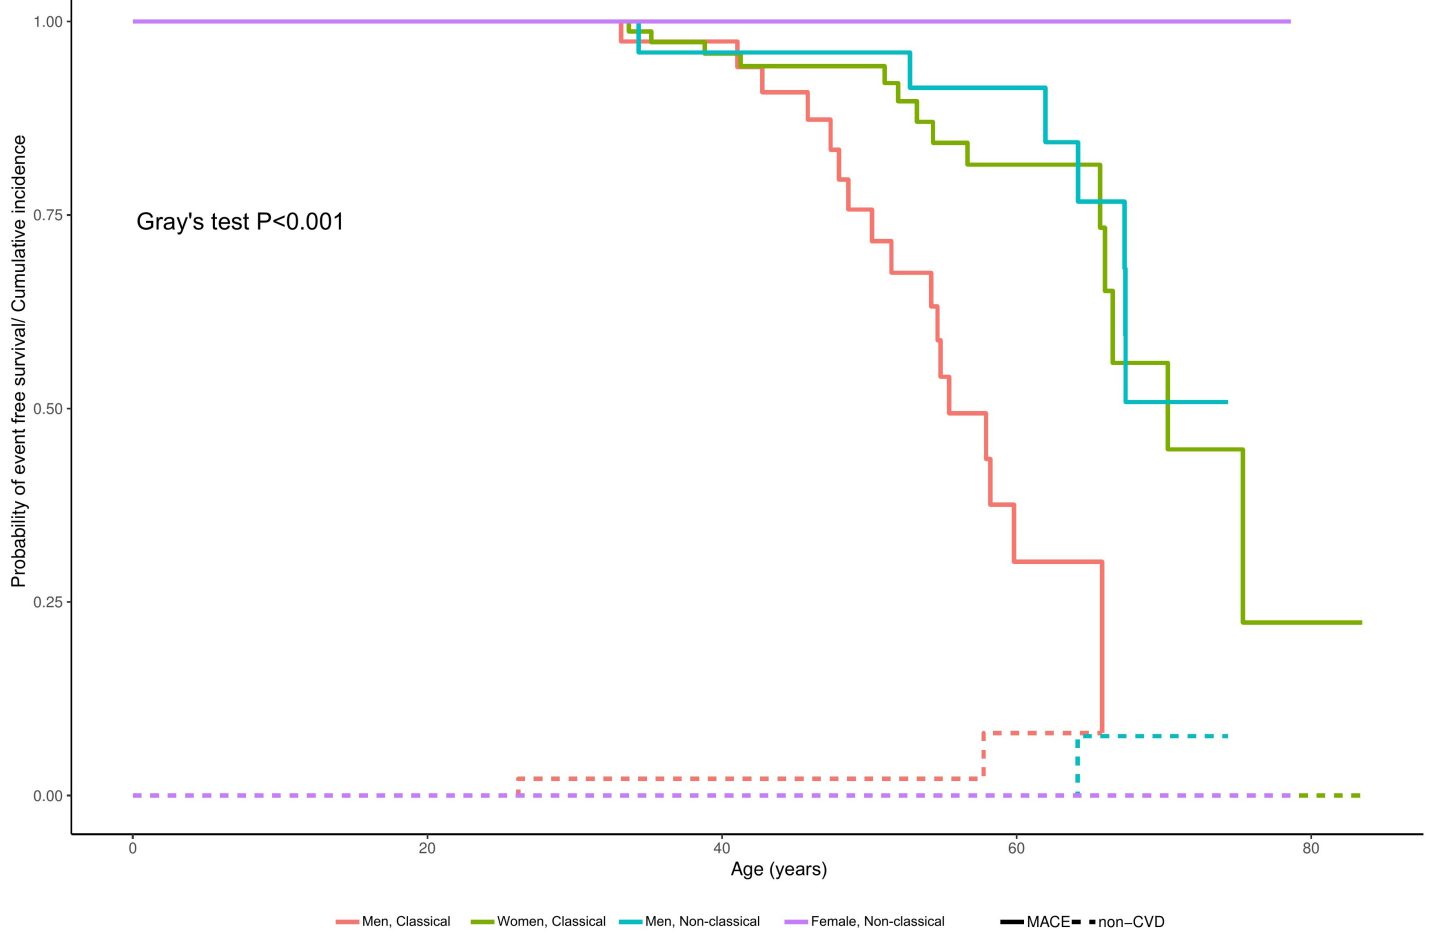

Supplement: heartjnl-2020-317922supp004_data_supplement.pdf [file heartjnl-2020-317922supp004_data_supplement.pdf]

Supplemental figure 4: Heart failure hospitalization, competing risk= non-CVD

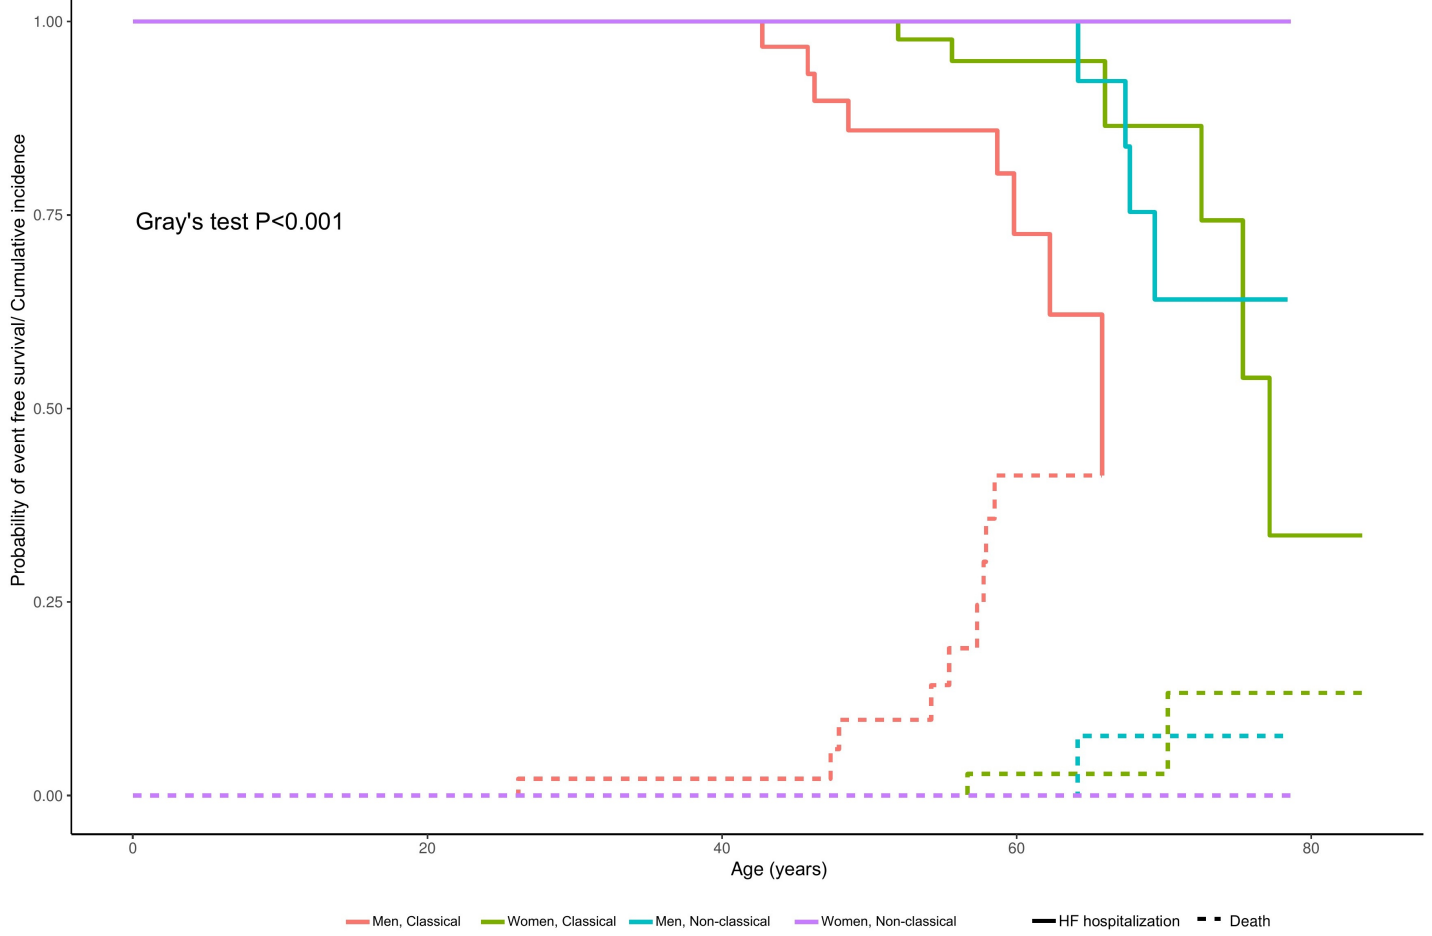

Supplement: heartjnl-2020-317922supp006_data_supplement.pdf [file heartjnl-2020-317922supp006_data_supplement.pdf]
